# Supplementary material for: The ultrafast reconfigurability and ultrahigh durability of an NiFe phosphide electrocatalyst with an Fe-rich surface induced by in situ acid corrosion for water oxidations
Source: Royal Society of Chemistry journal article supplement (doi:10.1039/d4qi01378f), 2024-01-01
Supplement: d4qi01378f2.pdf [file d4qi01378f2.pdf]

## Supporting Information

### **The ultrafast reconfigurability and ultrahigh durability of NiFe phosphides electrocatalyst with a Fe-rich surface induced by in-situ acid corrosion for water oxidations**

*Min Jiang,<sup>a</sup> Jiaming Zhang,<sup>b</sup> Hanxiao Liao,<sup>a</sup> Huanhuan Zhai,<sup>a</sup> Xuanzhi Liu,<sup>a</sup> Pengfei Tan<sup>\*,a</sup>, Ke Yang<sup>\*,c</sup> and Jun Pan<sup>\*,a</sup>*

<sup>a</sup>State Key Laboratory for Powder Metallurgy, Central South University Lushan South Street 932, Changsha 410083, China.

<sup>b</sup>School of Chemistry and Chemical Engineering, Central South University Lushan South Street 932, Changsha 410083, China.

<sup>c</sup>Department of Applied Physics, The Hong Kong Polytechnic University, Kowloon, Hong Kong, China.

\*corresponding author: [jun.pan@csu.edu.cn](mailto:jun.pan@csu.edu.cn); [keyanghnu@gmail.com](mailto:keyanghnu@gmail.com);

[tpf0203@csu.edu.cn](mailto:tpf0203@csu.edu.cn)

Fax: +86-731-88871017; Tel: +86-731-88836329

## Experimental Section

*Chemicals and materials:* Nickel iron foam (NFF; thickness: 1.5 mm; number of pores per inch: 95 ppi; atomic ratio of Ni/Fe = 1:1), nickel foam (NF, 1.5 mm, 95 ppi), iron foam (FF, 1.5 mm, 95 ppi), were purchased from Kunshan Longshengbao Electronic Material Co., Ltd. (Note: The commercial NFF is heterogeneous but repeatable.) Potassium hydroxide (KOH, AR, 98%) and hydrochloric acid (HCl, AR, 36%) were purchased from Sinopharm Chemical Reagent Co., Ltd. Red phosphorous (P, AR, 98.5%) were purchased from Aladdin Chemistry Co., Ltd.

*Synthesis of o-NiFe foam:* Prior to synthesis,  $1 \times 1.5 \text{ cm}^2$  of commercial NiFe foam was washed with 1.0 M HCl solutions for 10 min, then rinsed with ultrapure water and dried with a hair dryer. Subsequently, the cleaned NiFe foam was immersed in a beaker containing 10 mM HCl solutions. After stirring and sonication for 5 min, the moist NiFe foam was removed and allowed to stand in air for 1 h. After rinsing with ultrapure water and drying with a hair dryer, o-NiFe foam was obtained.

*Synthesis of o-NiFeP/NFF, o-NiP/NF, and o-FeP/FF:* Red phosphorus (50 mg) and four pieces of o-NiFe foam ( $1 \times 1.5 \text{ cm}^2$ ) were placed upstream (inlet) and downstream of the tube furnace. Subsequently, the samples were heated to 500 °C (10 °C/min) under a nitrogen atmosphere and held for 1 h. After cooling, the o-NiFeP/NFF pre-catalyst was obtained.

As comparison samples, o-NiP/NF and o-FeP/FF were prepared in the same way as o-NiFeP/NFF, except that Ni foam (NF) and Fe Foam (FF) were used as substrate materials, respectively.

*Synthesis of NiFeP/NFF:* NiFeP/NFF is prepared in a similar way to o-NiFeP/NFF, except that the NiFe foam without acid etching is directly used for phosphating treatment.

*Characterizations:* The morphologies and element contents were detected via double beam scanning electron microscope systems (SEM, Helios Nanolab G3 UC), which equipped with an Energy Dispersive X-ray detector (EDS, Team Octane Plus), as well as Inductively coupled plasma mass spectrometry (ICP-MS, Agilent 720ES). X-ray diffraction (XRD) and Transmission electron microscopy (TEM) characterizations

were carried out on a Rigaku-TTRIII and a TecnaiG2 20ST, respectively. All XPS spectra were obtained on X-ray photoelectron spectrometer (XPS, K-Alpha 1063) and corrected using C1s line at 284.8 eV. Raman measurements were performed on a micro-Raman spectrometer (DXR3) under an excitation of 532 nm laser light.

*Electrochemical measurements:* All the OER catalytic measurements were carried out on a CHI660E electrochemistry workstation in 1.0 M KOH electrolyte with a typical three-electrode system, in which the as-prepared electrocatalyst with geometric area of  $1 \times 1 \text{ cm}^2$  soaked into electrolyte as the working electrode, a Pt sheet as the counter electrode, and an Ag/AgCl electrode as the reference electrode. Then the RHE potentials in the three electrolytes were determined from the corresponding open-circuit potentials (-1.015 V for 1.0 M KOH). The electrode potential was converted to the RHE scale using  $E \text{ (vs. RHE)} = E \text{ (vs. Ag/AgCl)} + 1.015 \text{ V}$  for the measurements in 1.0 M KOH electrolyte. The overpotential ( $\eta$ ) was calculated by  $\eta = E \text{ (vs. RHE)} - 1.23 \text{ V}$  for OER.

200 cyclic voltammetry (CV) scans ( $50 \text{ mV s}^{-1}$ , 0-0.8 V vs. Ag/AgCl) were applied to remove the surface contaminants and electrochemically activate the catalysts to achieve a relatively stable performance before linear sweep voltammetry (LSV) measurements. LSV was recorded at a scan rate of  $5 \text{ mV s}^{-1}$  with *iR*-correction (90%). 200 CV scans ( $50 \text{ mV s}^{-1}$ , 0-0.1 V vs. Ag/AgCl) were applied before investigating surface reconstruction affected by CV activation in OER. Cyclic voltammetry (CV) tested at different scan rates for obtaining electrochemical double layer capacitance (C<sub>dl</sub>) values; Electrochemical impedance spectroscopy (EIS) tests were carried out from 100 kHz to 10 mHz.

The Tafel slope was calculated by the equation below:

$$\eta = a + b \log(j)$$

Where  $\eta$  stands for the overpotential,  $b$  stands for the Tafel slope,  $j$  stands for the current density.

## First-principles calculations

The spin-polarized Density functional theory (DFT) calculations were performed to study catalytic mechanism in VASP<sup>1, 2</sup> with a projector augmented wave (PAW) basis<sup>3</sup>. The Perdew-Burke-Ernzerhof (PBE) Generalized Gradient Approximation (GGA) exchange-correlation functional method was used to describe the exchange-correlation interaction. For all the calculations, the kinetic energy cutoff for electronic plane wave expansion was set to 450 eV. Brillouin zone integration was performed on grids  $\Gamma$ -centered  $3 \times 3 \times 1$  k-points-grids for the structural relaxation and electronic structure calculations. The DFT/GGA+U were performed (Fe 3d and Ni 3d were 4 and 3 eV) to consider to strong correction interaction<sup>4</sup>. Moreover, the dispersive van der Waals (vdW) interactions were also taken into account by the zero damping DFT-D3 method with Becke-Jonson damping<sup>5, 6</sup>. Total energy and the forces on each atom were converged to less than  $10^{-6}$  eV and 0.03 eV/Å, respectively. The vacuum layer of around 15 Å along z direction was inserted to eliminate the spurious interaction between periodic images. The Gibbs free energy change was calculated<sup>7, 8</sup>:

$$\Delta G = \Delta E + \Delta E_{ZPE} - T\Delta S + \Delta G_{pH} + \Delta G_V$$

where  $\Delta E$  is the reaction energy.  $\Delta E_{ZPE}$  and  $\Delta S$  are the change in the zero-point energy and the vibrational entropy at temperature  $T$ , respectively.  $\Delta G_{pH} = k_B T \times pH \times \ln 10$  is the correction from the proton concentration as indicated by the pH value, where  $k_B$  is the Boltzmann constant.  $\Delta G_V = eV$  is the correction from the applied electrode potential ( $V$ ). Here, the standard conditions were adopted, *i.e.*, pressure  $p = 1$  bar,  $pH = 14$  and  $T = 298.15$  K. The (0001) surface of  $\text{Ni}_{2-x}\text{Fe}_x\text{P}$  ( $x=0\sim 0.33$ ) and (01 $\bar{1}$ 2) surface of NiFeOOH with Fe-rich and Ni-rich have been select to study the catalytic properties, as shown in Figure S4.

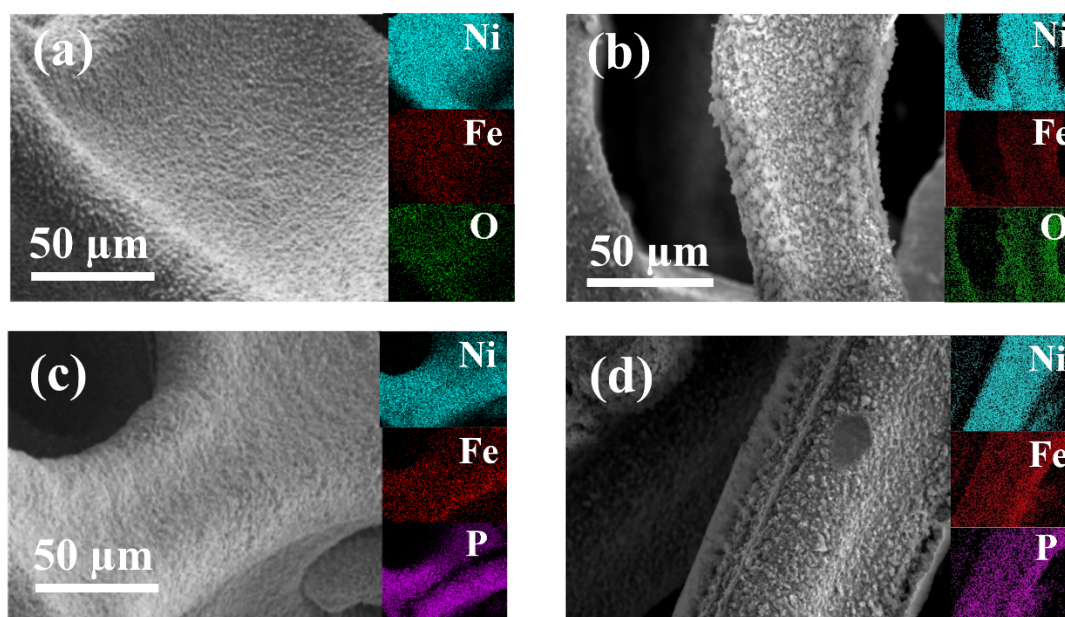

**Figure S1** SEM images and surface element mappings of (a) NiFe foam, (b) o-NiFe foam, (c) NiFeP/NFF after 200 cycles of CV, and (d) o-NiFeP/NFF after 200 cycles of CV.

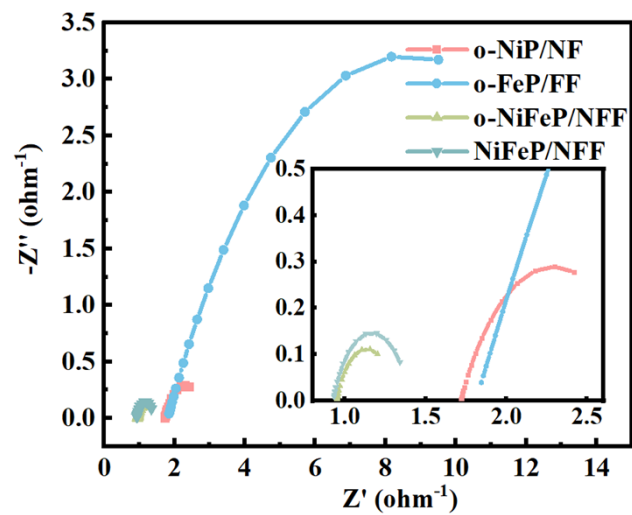

**Figure S2.** Nyquist plots of o-NiP/NF, o-FeP/FF, o-NiFeP/NFF, and NiFeP/NFF.

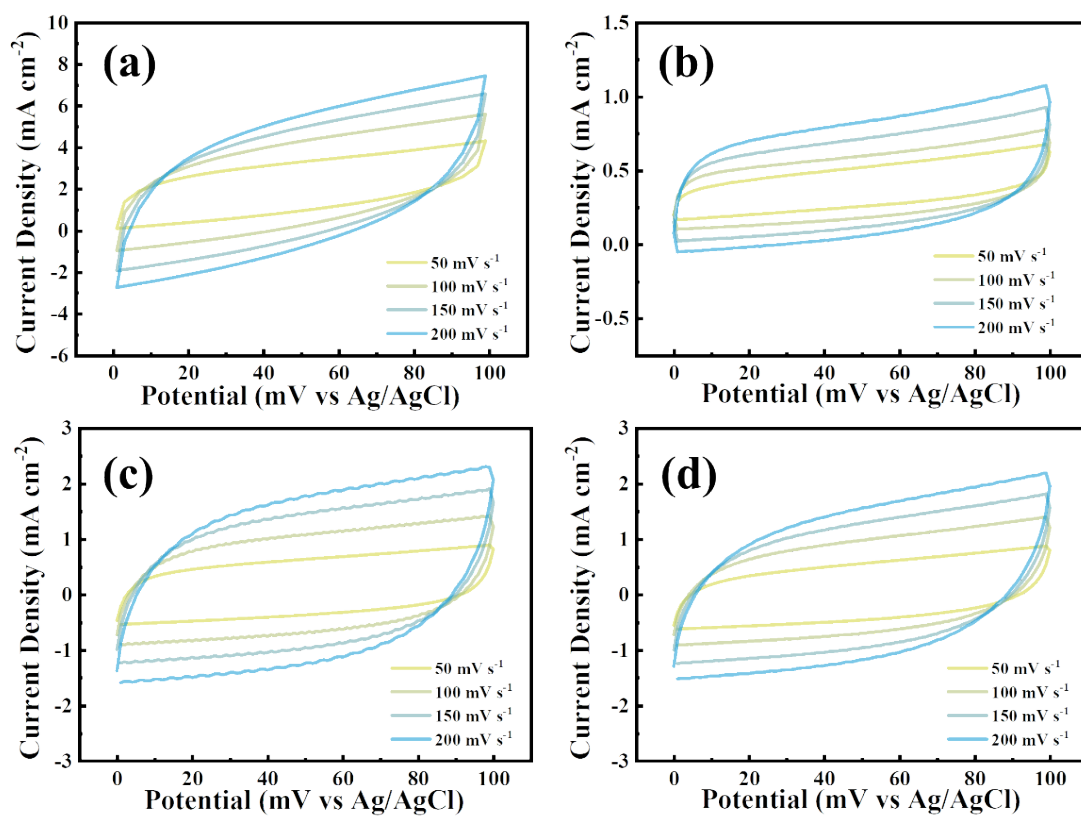

**Figure S3.** CV curves of (a) o-NiP/NF, (b) o-FeP/FF, (c) o-NiFeP/NFF, and (d) NiFeP/NFF samples obtained at 50, 100, 150 and 200  $\text{mV s}^{-1}$  in the range of 0-100 mV vs. Ag/AgCl.

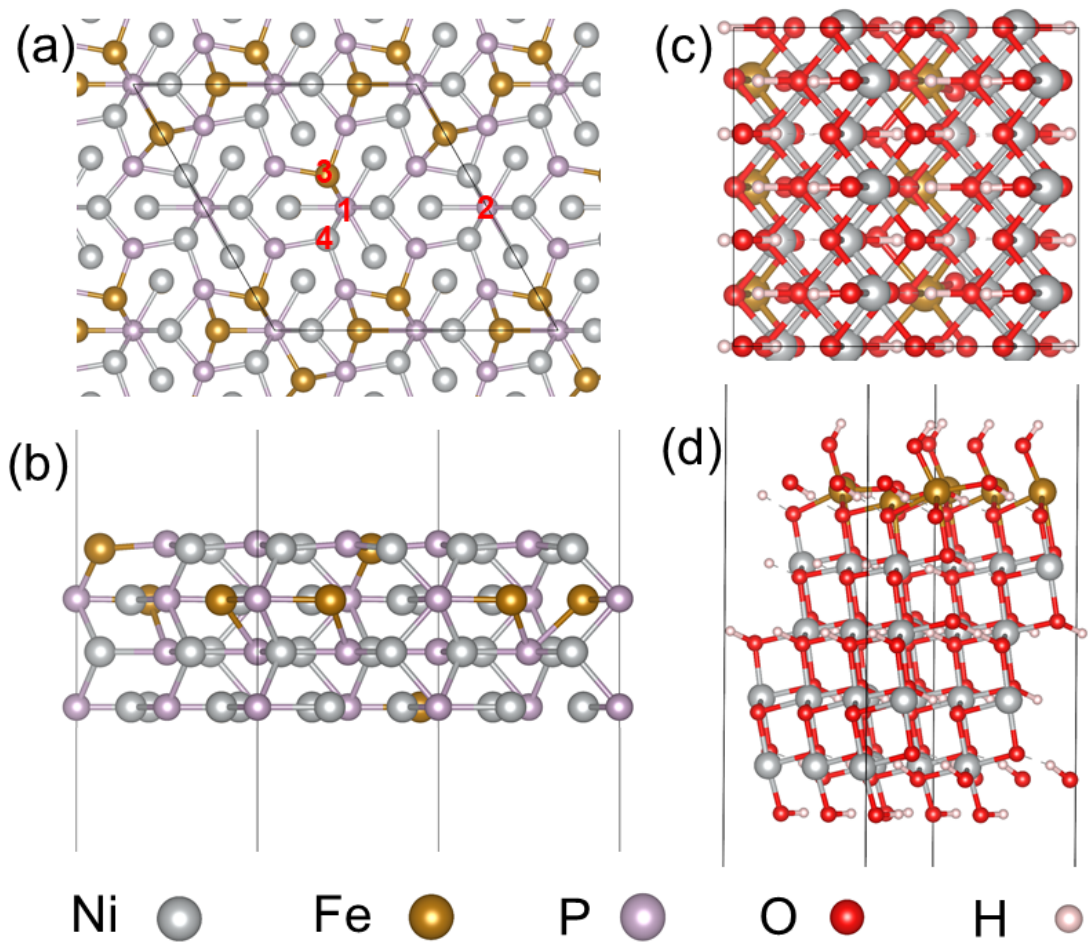

**Figure S4.** The top and front view of  $\text{Ni}_{2-x}\text{Fe}_x\text{P}$  (a-b) and Fe(Ni)-rich upper (lower) surface of  $\text{NiFeOOH}$  (c-d). 1-4 mean the NiFe hollow site, Ni hollow site, Fe-top site and Ni-top site for OH adsorption.



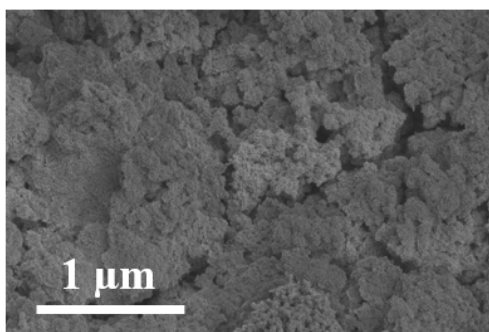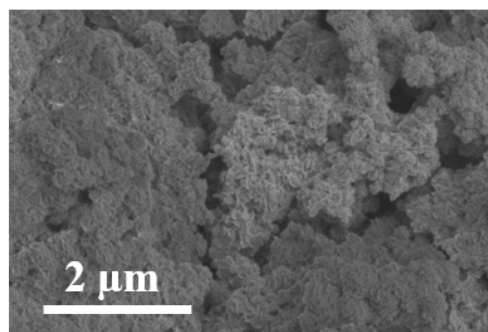

**Figure S5.** SEM images of o-NiFeP/NFF after being immersed in a 1.0 M potassium hydroxide solution

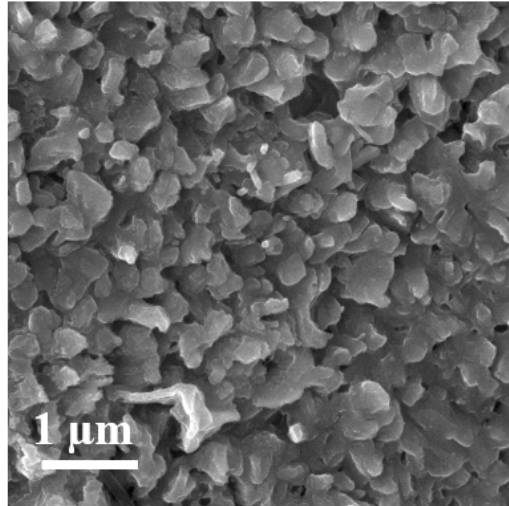

**Figure S6.** The SEM image of o-NiFeP/NFF after 468h testing

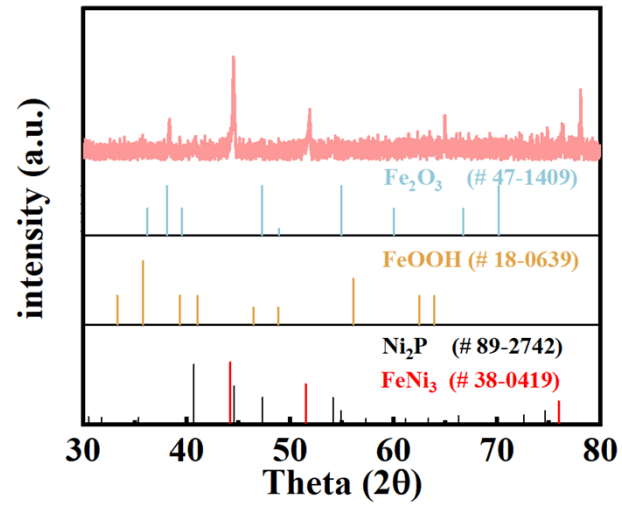

**Figure S7.** The XRD pattern of o-NiFeP/NFF after 468h testing.

**Table S1** The generating mass of Ni<sup>2+</sup>/Fe<sup>2+</sup> along with the etching time when 1×1.5 cm<sup>2</sup> NiFe foam being soaked in 1.0 M HCl solutions by ICP-OES.

| Dissolution time | m <sub>Fe</sub> (mg) | m <sub>Ni</sub> (mg) | Δm <sub>Fe</sub> /Δm <sub>Ni</sub> |
|------------------|----------------------|----------------------|------------------------------------|
| t=10 min         | 0.99                 | 0.11                 | 9/1                                |
| t=20 min         | 1.80                 | 0.20                 | 9/1                                |
| t=30 min         | 2.43                 | 0.27                 | 9/1                                |
| All dissolved    | 23.78                | 19.91                | 1.20/1                             |

**Table S2** The elemental weight percentages measured from EDS.

| Sample                       | Atomic Percentage (At%) |       |          |       |       |
|------------------------------|-------------------------|-------|----------|-------|-------|
|                              | Ni                      | Fe    | Fe/Ni+Fe | P     | O     |
| NiFe foam                    | 96.14                   | 3.13  | 0.032    | -     | 0.71  |
| o-NiFe foam                  | 76.98                   | 18.41 | 0.193    | -     | 4.60  |
| NiFeP/NFF                    | 65.88                   | 3.78  | 0.054    | 12.39 | 1.90  |
| o-NiFeP/NFF                  | 64.06                   | 16.03 | 0.200    | 13.45 | 6.46  |
| NiFeP/NFF after 200 cycles   | 71.97                   | 3.68  | 0.048    | 13.09 | 11.25 |
| o-NiFeP/NFF after 200 cycles | 58.89                   | 22.50 | 0.276    | 7.60  | 11.00 |

**Table S3** Parameters obtained from the fitted plots using the relevant equivalent circuit.

| Samples     | $R_{ct}$ ( $\Omega$ ) | CPE-T (F) | CPE-P (F) |
|-------------|-----------------------|-----------|-----------|
| o-NiP/NF    | 1.146                 | 1.126     | 0.596     |
| o-FeP/FF    | 13.69                 | 0.023     | 0.558     |
| o-NiFeP/NFF | 0.369                 | 1.625     | 0.694     |
| NiFeP/NFF   | 0.479                 | 0.554     | 0.699     |

**Table S4** Tafel slope comparison of NiFe based oxides, layered double hydroxides, and phosphides for OER.

| Samples                                                    | Electrolytes | Tafel slope (mV dec <sup>-1</sup> ) | Ref. |
|------------------------------------------------------------|--------------|-------------------------------------|------|
| NiFe <sub>2</sub> O <sub>4</sub>                           | 1 M KOH      | 42                                  | 9    |
| NiFeO <sub>x</sub> /CFP                                    | 1 M KOH      | 32                                  | 10   |
| α-FeNiO <sub>x</sub>                                       | 0.1 M KOH    | 24                                  | 11   |
| NiFeO <sub>x</sub> NTAs                                    | 1 M KOH      | 47                                  | 12   |
| Ni <sub>60</sub> Fe <sub>40</sub> O <sub>x</sub>           | 0.1 M KOH    | 34                                  | 13   |
| O-NiFeLDH/NF                                               | 1 M KOH      | 29                                  | 14   |
| NiFe-LDH                                                   | 1 M KOH      | 40                                  | 15   |
| FeNi-rGO LDH                                               | 1 M KOH      | 39                                  | 16   |
| NiFeLDH-NS@DG/GCE                                          | 1 M KOH      | 52                                  | 17   |
| Ni <sub>2</sub> P/C@NF                                     | 1 M KOH      | 65                                  | 18   |
| NiCoFeP                                                    | 1 M KOH      | 83                                  | 19   |
| NiFe-P/NF                                                  | 1 M KOH      | 59                                  | 20   |
| (Ni <sub>0.5</sub> Fe <sub>0.5</sub> ) <sub>2</sub> P/NF   | 1 M KOH      | 57                                  | 21   |
| (Ni <sub>0.87</sub> Fe <sub>0.13</sub> ) <sub>2</sub> P/Ni | 1 M KOH      | 96                                  | 22   |
| Ni <sub>2</sub> P/(NiFe) <sub>2</sub> P(O)NA/NF            | 1 M KOH      | 60                                  | 23   |

**Table S5** Calculated binding energy of OH on different sites of Ni<sub>2-x</sub>Fe<sub>x</sub>P .(eV)

| Models                                  | <i>NiFe-hollow</i> | Ni-hollow | Fe-top | Ni-top |
|-----------------------------------------|--------------------|-----------|--------|--------|
| Ni <sub>2</sub> P                       | x                  | -3.93     | x      | -2.17  |
| Ni <sub>1.92</sub> Fe <sub>0.08</sub> P | -4.27              | -3.94     | -3.17  | -2.22  |
| Ni <sub>1.66</sub> Fe <sub>0.33</sub> P | -4.29              | -3.97     | -3.20  | -2.28  |

## References

1. G. Kresse, J. Furthmüller, Efficient iterative schemes for ab initio total-energy calculations using a plane-wave basis set. *Phys. Rev. B* 1996, **54**, 11169.
2. G. Kresse, J. Furthmüller, Efficiency of ab-initio total energy calculations for metals and semiconductors using a plane-wave basis set. *Comput. mater. sci.* 1996, **6**, 15-50.
3. P. E. Blöchl, Projector augmented-wave method, *Physical review B*, 1994, **50**, 17953.
4. A. Petukhov, I. Mazin, L. Chioncel, A. Lichtenstein, Correlated metals and the LDA+ U method. *Phys. Rev.B* 2003, **67**, 153106.
5. S. Grimme, J. Antony, S. Ehrlich and H. Krieg, A consistent and accurate ab initio parametrization of density functional dispersion correction (DFT-D) for the 94 elements H-Pu, *The Journal of chemical physics*, 2010, **132**.
6. S. Grimme, S. Ehrlich and L. Goerigk, Effect of the damping function in dispersion corrected density functional theory, *Journal of computational chemistry*, 2011, **32**, 1456-1465.
7. J. K. Nørskov, T. Bligaard, A. Logadottir, J. Kitchin, J. G. Chen, S. Pandelov and U. Stimming, Trends in the exchange current for hydrogen evolution, *Journal of The Electrochemical Society*, 2005, **152**, J23.
8. J. K. Nørskov, J. Rossmeisl, A. Logadottir, L. Lindqvist, J. R. Kitchin, T. Bligaard and H. Jonsson, Origin of the overpotential for oxygen reduction at a fuel-cell cathode, *The Journal of Physical Chemistry B*, 2004, **108**, 17886-17892.
9. M. S. Al-Hoshan, J. P. Singh, A. M. Al-Mayouf, A. A. Al-Suhybani and M. N. Shaddad, Synthesis, Physicochemical and Electrochemical Properties of Nickel Ferrite Spinel Obtained by Hydrothermal Method for the Oxygen Evolution Reaction (OER), *Int J Electrochem Sc*, 2012, **7**, 4959-4973.
10. H. T. Wang, H. W. Lee, Y. Deng, Z. Y. Lu, P. C. Hsu, Y. Y. Liu, D. C. Lin and Y. Cui, Bifunctional non-noble metal oxide nanoparticle electrocatalysts through lithium-induced conversion for overall water splitting, *Nat Commun*, 2015, **6**.
11. R. D. L. Smith, M. S. Prevot, R. D. Fagan, Z. P. Zhang, P. A. Sedach, M. K. J. Siu, S. Trudel and C. P. Berlinguette, Photochemical Route for Accessing Amorphous Metal Oxide Materials for Water Oxidation Catalysis, *Science*, 2013, **340**, 60-63.
12. X. Teng, J. Y. Wang, L. L. Ji, Y. K. Lv and Z. F. Chen, Ni nanotube array-based electrodes by electrochemical alloying and de-alloying for efficient water splitting, *Nanoscale*, 2018, **10**, 9276-9285.
13. R. D. L. Smith, M. S. Prevot, R. D. Fagan, S. Trudel and C. P. Berlinguette, Water Oxidation Catalysis: Electrocatalytic Response to Metal Stoichiometry in Amorphous Metal Oxide Films Containing Iron, Cobalt, and Nickel, *J Am Chem Soc*, 2013, **135**, 11580-11586.
14. Z. Qiu, C. W. Tai, G. A. Niklasson and T. Edvinsson, Direct observation of active catalyst surface phases and the effect of dynamic self-optimization in

- NiFe-layered double hydroxides for alkaline water splitting, *Energ Environ Sci*, 2019, **12**, 572-581.
15. F. Song and X. L. Hu, Exfoliation of layered double hydroxides for enhanced oxygen evolution catalysis, *Nat Commun*, 2014, **5**.
  16. X. Long, J. K. Li, S. Xiao, K. Y. Yan, Z. L. Wang, H. N. Chen and S. H. Yang, A Strongly Coupled Graphene and FeNi Double Hydroxide Hybrid as an Excellent Electrocatalyst for the Oxygen Evolution Reaction, *Angew Chem Int Edit*, 2014, **53**, 7584-7588.
  17. Y. Jia, L. Z. Zhang, G. P. Gao, H. Chen, B. Wang, J. Z. Zhou, M. T. Soo, M. Hong, X. C. Yan, G. R. Qian, J. Zou, A. J. Du and X. D. Yao, A Heterostructure Coupling of Exfoliated Ni-Fe Hydroxide Nanosheet and Defective Graphene as a Bifunctional Electrocatalyst for Overall Water Splitting, *Adv Mater*, 2017, **29**.
  18. H. Q. Qu, Y. R. Ma, Z. L. Gou, B. Li, Y. R. Liu, Z. X. Zhang and L. Wang, Ni<sub>2</sub>P/C nanosheets derived from oriented growth Ni-MOF on nickel foam for enhanced electrocatalytic hydrogen evolution, *J Colloid Interf Sci*, 2020, **572**, 83-90.
  19. K. H. Wang, Y. Y. Si, Z. H. Lv, T. P. Yu, X. Liu, G. X. Wang, G. W. Xie and L. H. Jiang, Efficient and stable Ni-Co-Fe-P nanosheet arrays on Ni foam for alkaline and neutral hydrogen evolution, *Int J Hydrogen Energ*, 2020, **45**, 2504-2512.
  20. B. W. Zhang, Y. H. Lui, L. Zhou, X. H. Tang and S. Hu, An alkaline electro-activated Fe-Ni phosphide nanoparticle-stack array for high-performance oxygen evolution under alkaline and neutral conditions, *J Mater Chem A*, 2017, **5**, 13329-13335.
  21. J. H. Yu, G. Z. Cheng and W. Luo, Hierarchical NiFeP microflowers directly grown on Ni foam for efficient electrocatalytic oxygen evolution, *J Mater Chem A*, 2017, **5**, 11229-11235.
  22. J. H. Chen, Y. M. Li, G. Q. Sheng, L. Xu, H. Q. Ye, X. Z. Fu, R. Sun and C. P. Wong, Iron-Doped Nickel Phosphide Nanosheets InSitu Grown on Nickel Submicrowires as Efficient Electrocatalysts for Oxygen Evolution Reaction, *Chemcatchem*, 2018, **10**, 2248-2253.
  23. W. G. Xi, G. Yan, Z. L. Lang, Y. Y. Ma, H. Q. Tan, H. T. Zhu, Y. H. Wang and Y. G. Li, Oxygen-Doped Nickel Iron Phosphide Nanocube Arrays Grown on Ni Foam for Oxygen Evolution Electrocatalysis, *Small*, 2018, **14**.
